# Supplementary material
Source: PubMed Central journal article supplement (PMC3366835)
Supplement: supp_M112.360719_Supplemental.pdf [file supp_M112.360719_Supplemental.pdf]

## SUPPLEMENTAL DATA

### SUPPLEMENTAL EXPERIMENTAL PROCEDURES

*Constructs-* *pUAST-GFP-Ada-FL*, *pUAST-GFP-Ada-ΔEar*, *pUAST-GFP-Ada-Trunk*, *pUAST-GFP-Ada-N2*, and *pUAST-GFP-Ada-ΔNΔEar* were generated by fusing EGFP in frame at the 5' terminus of the *α-ada* coding sequence (Ada-FL [aa 1-940]; Ada-ΔEar [aa 1-713]; Ada-Trunk [aa 1-621], Ada-N2 [aa 1-400], Ada-ΔNΔEar [aa 81-713], respectively), followed by subcloning of the resulting fusion constructs into the *pUAST* vector. *α-ada* coding sequences were obtained by PCR. Primer sequences were available upon request. Transgenic flies for these *GFP-α-Ada* fusion constructs were generated in our lab or by BestGene Inc. USA. *pUAST-Numb-PTB-GFP-α-Ada* or *pUAST-Numb-PTB-GFP* was generated by inserting Nb-PTB sequence (aa 1-203) at the 5' terminus of GFP-Ada fusion or EGFP, respectively, followed by subcloning into the *pUAST* vector and microinjection, as described above.

ΔNm-Spdo was generated by replacing the YTNPAF motif [6-11aa] in the N-terminus of Spdo with TG (creating an AgeI restriction site). *pUAST-Spdo-GFP* and *pUAST-ΔNm-Spdo-GFP* were generated by inserting EGFP coding sequence in frame at the 3' terminus of Spdo and ΔNm-Spdo, respectively, followed by subcloning of the resulting fusion constructs into the *pUAST* vector.

To generate constructs for co-immunoprecipitation experiments, cDNA fragments encoding Ada-FL (aa 1-940), Ada-ΔEar5 (aa 1-850), Ada-ΔEar (aa 1-713) or Ada-Trunk (aa 1-621) were cloned in-frame into a *pcDNA3* expression vector harboring a Flag tag at the N-terminus. Similarly, Nb-FL (aa 1-557), Nb-N (aa 1-267), Nb-C (aa 268-557), Nb-ΔPTB (Δ79-203), Nb-ΔCT (aa 1-426), Nb-PTB (aa 1-203) or Nb-M (aa 204-364) tagged with a Flag epitope at the N-terminus were cloned into *pcDNA3* vector. *pcDNA3-Myc-Ada-FL* contains a N-terminal Myc tag in frame with the coding region of Ada-FL, while *pcDNA3-Numb-Myc* contains a C-terminal Myc tag in frame with the coding region of full-length Numb (1).

*Cell culture and co-immunoprecipitation* - HEK293T cells were maintained in DMEM medium (GIBCO) supplemented with 10% newborn calf serum (Lonza). For co-immunoprecipitation experiments, HEK293T cells were transfected with Fugene 6 transfection reagent (Roche) following the manufacturer's protocol. 48 hours after transfection, cells were harvested, washed with ice-cold PBS and incubated for 20 minutes with 450 μl of lysis buffer (50 mM Tris-HCl pH 8.0, 120 mM NaCl, 5 mM EDTA, 1% Triton X-100, 10% glycerol) containing protease inhibitor cocktail (Sigma) and phosphatase inhibitor cocktail 1 (Sigma). The cell lysate was centrifuged for 5 minutes at 13,000 rpm and the supernatant was collected. The lysate was incubated with mouse anti-FLAG M2 antibody coupled to agarose beads (Sigma), with gentle mixing at 4°C for 3-4 hours. Beads were washed with lysis buffer three times for 5 min each. Proteins were eluted from agarose beads by the addition of sample buffer (Bio-Rad), boiled for 5 min, and analyzed by Western blotting with the indicated antibodies.

*Antibodies and Immunohistochemistry* - For larval brain immunostaining, the primary antibodies used were: chicken anti-GFP (1:2000, Abcam), mouse anti-Elav (1:200, Developmental Studies Hybridoma Bank [DSHB]), mouse anti-Pros (1:200, DSHB), mouse anti-N<sup>ECD</sup> C458.2H (1:200, DSHB), mouse anti-DI<sup>ECD</sup> (1:200, DSHB), rabbit anti-Miranda (1:1000, F. Matsuzaki), mouse anti-Miranda (1:10, F. Matsuzaki), guinea pig anti-Dpn (1:1000, J. Skeath), guinea pig anti-

Sanpodo (1:1000, J. Skeath), guinea pig anti-Numb (1:1000, J. Skeath), rabbit anti-PKC $\zeta$  C-20 (1:500, Santa Cruz Biotechnology, Inc.). Images were obtained on a Zeiss LSM510 confocal microscope.

Antibodies used for Western blotting were: rabbit anti-Ada (1:2000, N.J. Gay), rabbit anti-GFP (1:2000, Abcam), mouse anti-Flag M2 (1:1000, Sigma), rabbit anti-Flag (1:4000, Sigma), mouse anti-Myc (1:1000, Millipore), rabbit anti-Myc (1:1000, Cell Signaling Technology), guinea pig anti-Numb (1:20,000, J. Skeath).

*Sequence analysis:* The protein sequence of  $\alpha$ -Ada Trunk domain (A) or Numb-N (B) were aligned using Multalin (2).

## SUPPLEMENTARY REFERENCES

1. Ouyang, Y., Petritsch, C., Wen, H., Jan, L., Jan, Y. N., and Lu, B. (2011) *Development* **138**(11), 2185-2196
2. Corpet, F. (1988) *Nucleic Acids Res* **16**(22), 10881-10890

## SUPPLEMENTAL FIGURE LEGENDS

FIGURE S1. **Quantification of the relative distribution of Spdo immunofluorescence at the cell surface or cytoplasm of  $\alpha$ -ada<sup>1</sup> vs. control NBs or IPs.**

FIGURE S2. **AP2 $\sigma$  regulates Spdo endocytosis in NB lineages.** In an AP-2 $\sigma$ <sup>KG02457</sup> mutant type II NB clone (encircled by dashed line), Spdo (red) localized predominantly to the plasma membrane of Mira<sup>+</sup> primary NB (bracket), ectopic NBs or IP cells (yellow arrowheads), whereas a control NB outside of the clone (white open arrowheads) or its differentiating daughter cells (marked by dotted line) showed cytoplasmic Spdo localization. Scale bar: 10  $\mu$ m.

FIGURE S3. **Supporting evidence for a functional significance of the novel interaction between  $\alpha$ -Ada and Numb in regulating NB homeostasis.** *A*, schematic representations of Numb domain structures and various Numb deletion constructs. *B*, interaction between  $\alpha$ -Ada and fragments of Numb. Both Nb-N and Nb- $\Delta$ CT interacted with Ada-FL, but with reduced affinity compared to Nb-FL. *C*, NBs in single larval brain lobes of various genotypes are marked with Mira. Quantification of data from (*C*) is shown in (*D*). Scale bars: 100  $\mu$ m (*C*).

FIGURE S4. **Ada-Trunk is the minimal functional subunit in mediating NB homeostasis.** N-terminal or C-terminal deletions in Ada-Trunk (*A*) abolished the ability of Ada-Trunk to rescue the NB overproliferation (*C-E*) or Spdo cortical localization (*C'-E'*) phenotypes of  $\alpha$ -ada<sup>1</sup> mutants. Quantification of central brain NB number is shown in (*B*). Scale bars: 100  $\mu$ m (*C-E*); 5  $\mu$ m (*C'-E'*).

FIGURE S5. **A mutant form of Nb, Nb-TS4D, showed unusually tight interaction with Ada.** *A*, NB-specific overexpression of Nb-TS4D transgene resulted in strong NB (marked with Mira)

overproliferation phenotype. *B*, interaction between  $\alpha$ -Ada and WT, TS4D or TS4A forms of Numb proteins. Nb-TS4D interacted with Ada-FL with extraordinarily stronger affinity, compared to Nb-WT or Nb-TS4A. Green arrowheads indicate the Numb protein bands. Scale bar: 100  $\mu$ m.

**FIGURE S6. NB overproliferation phenotypes in *numb* mutant clones were completely suppressed by Numb-PTB-Ada.** Single type II lineage NB clones of *numb*<sup>15</sup> (*A*, *A'*), *numb*<sup>15</sup>; *Elav*>Ada-FL (*B*, *B'*) or *numb*<sup>15</sup>; *Elav*>Nb-PTB-Ada (*C*, *C'*) genotypes were marked with CD8-GFP (encircled by dashed line). Scale bars: 40  $\mu$ m.

**FIGURE S7. DI protein trafficking is not affected by Ada inactivation.** WT (*A-A''*) or  *$\alpha$ -ada*<sup>1</sup> (*B-B''*) mutant NBs at metaphase stage were triple labeled with DI<sup>ECD</sup>, Mira, and DNA. Delta showed cytoplasmic and vesicular distribution in both WT and *ada* mutant NBs. Scale bar: 10  $\mu$ m.

**FIGURE S8. Sequence alignments of the newly identified interacting domains in  $\alpha$ -Ada and Numb.** The protein sequence of  $\alpha$ -Ada Trunk domain (A) or Numb-N (B) were aligned using Multalin. The alignments include orthologs from *Drosophila* (*Drosophila melanogaster*), mouse (*Mus musculus*) and human (*Homo sapiens*). Violet or green letters indicate residues with high (90%) or low (50%) consensus levels, respectively. Grey letters denote neural residues.

# Supplemental Figure S1

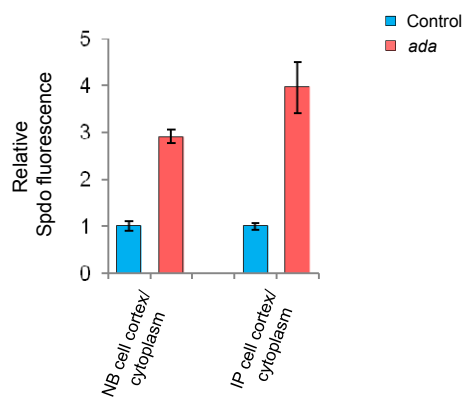

Supplemental Figure S2

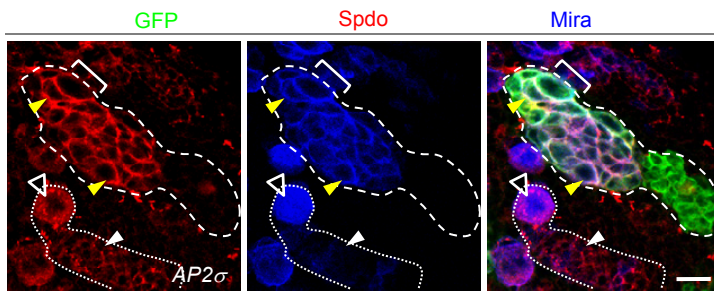

# Supplemental Figure S3

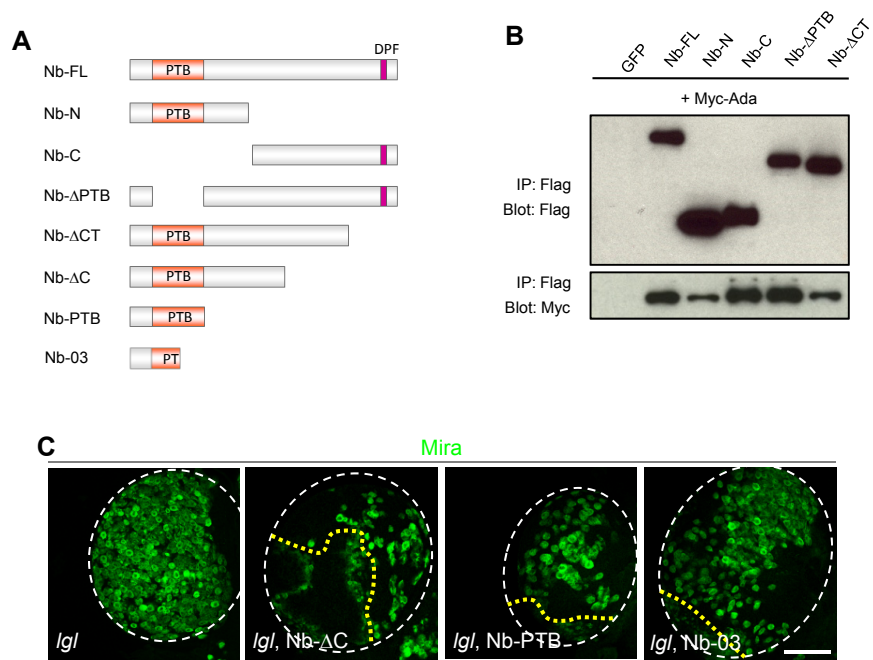

# Supplemental Figure S4

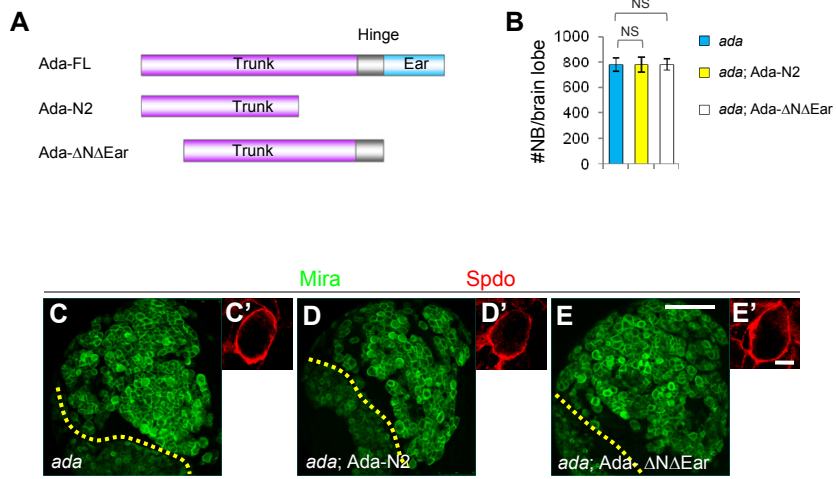

# Supplemental Figure S5

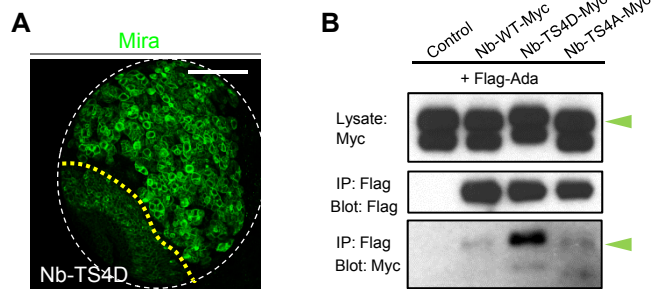



Supplemental Figure S6

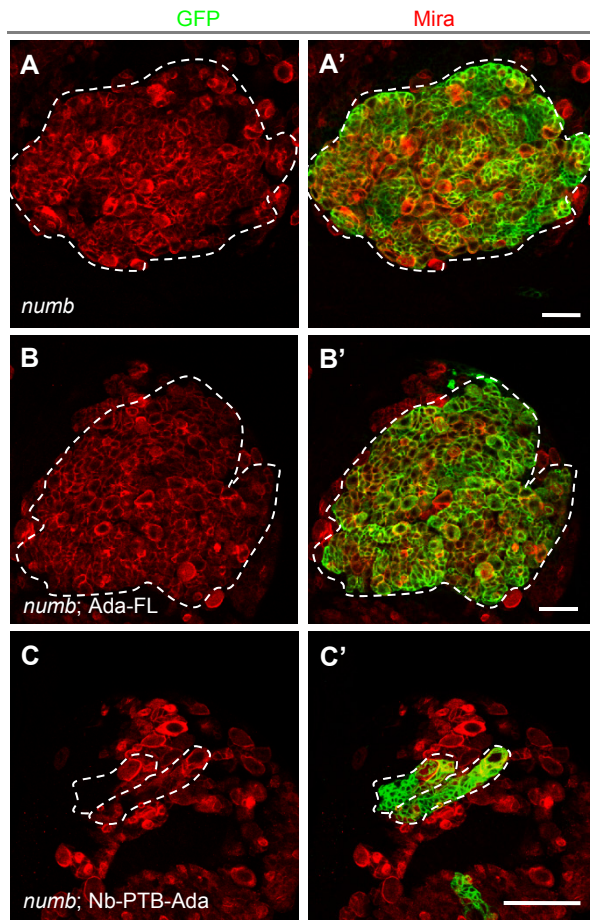

Supplemental Figure S7

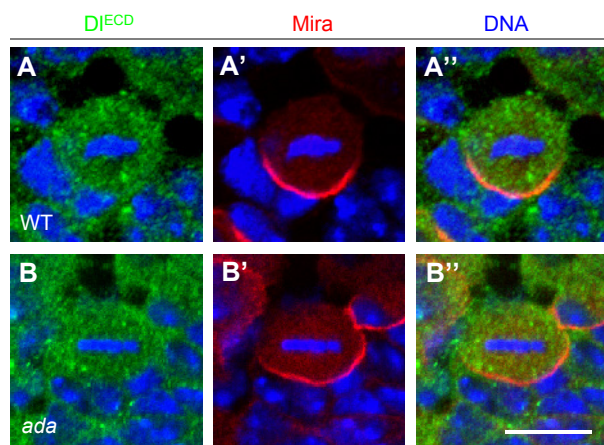

# Supplemental Figure S8

## A

### The Trunk domain of $\alpha$ -Adaptin

|            |     |                                                                                                                                    |     |
|------------|-----|------------------------------------------------------------------------------------------------------------------------------------|-----|
| Drosophila | 1   | MIPYRGGDGRGLAVFISDIRNCKSKAEYKRIKELANIRSKFKGDKTLDGQKKKYVCKLLFIFLLGHIDFGHMEAVNLLSSNKSEKIQIGYLFISVLYNTNSDLIRLIIISTKNDLQSRNPVHVN       | 129 |
| Mouse      | 1   | MPAVSKGGDGRGLAVFISDIRNCKSKAEIKRIKELANIRSKFKGDKALDGYSKKKYVCKLLFIFLLGHIDFGHMEAVNLLSSNRYTEKIQIGYLFISVLYNSNSELIRLINAIKNDLQSRNPTFMGL    | 130 |
| Human      | 1   | MPAVSKGGDGRGLAVFISDIRNCKSKAEIKRIKELANIRSKFKGDKALDGYSKKKYVCKLLFIFLLGHIDFGHMEAVNLLSSNRYTEKIQIGYLFISVLYNSNSELIRLINAIAIKNDLQSRNPTFMGL  | 130 |
| Drosophila | 130 | ALQCIANIGSRDHAESF SNEIPKLLVSGDTHDVKQSRALCLLRLFRSPOIIPGAEHTSRIIHLLNDQHGMYVTAATSLIDA VKRNPDEYVGCYNLAVSRLSRIVYASYTDLQDYTYFVPAPALSVK   | 259 |
| Mouse      | 131 | ALHCIAVNGSREHAERF AGEIPIKLVVAGDTHDSVKQSRALCLLRLYRTSPDLVPHGDHTSRVHLLNDQHLGVYTAATSLITTLAQKNPEEFKTSVSLAVSRLSRIVYASSTDLQDYTYFVPAPALSVK | 260 |
| Human      | 131 | ALHCIAVNGSREHAERF AGEIPIKLVVAGDTHDSVKQSRALCLLRLYRTSPDLVPHGDHTSRVHLLNDQHLGVYTAATSLITTLAQKNPEEFKTSVSLAVSRLSRIVYASSTDLQDYTYFVPAPALSVK | 260 |
| Drosophila | 260 | LLRLLANVNYTEIGVRAKLLTLETILNKAQEPKSKKVQHSNAKNAVLFERISLIHSDSEPNLLVRACNQLGQFLSHRETNLRYLALESMTLASSEFSHEAVKTHIETVINALKTERDVSVRORA       | 389 |
| Mouse      | 261 | LLRLLQCYPPP-DPA-VRGRLTECLETILNKAQEPKSKKVQHSNAKNAVLFERISLIHSDSEPNLLVRACNQLGQFLSHRETNLRYLALESMTLASSEFSHEAVKTHIETVINALKTERDVSVRORA    | 388 |
| Human      | 261 | LLRLLQCYPPP-DPA-VRGRLTECLETILNKAQEPKSKKVQHSNAKNAVLFERISLIHSDSEPNLLVRACNQLGQFLSHRETNLRYLALESMTLASSEFSHEAVKTHIETVINALKTERDVSVRORA    | 388 |
| Drosophila | 390 | VDLLYAMCDRSHNPEFVQENHLYLETADYSIREEMVILKVAILAEKYAVDYTYWYVITILNLRIRAGDYVSEEVHYRVIQIYINRDOVQGYAAKTVFEALQAPACHENLVKVGYYLGEFGNLTAGDPSAP | 519 |
| Mouse      | 389 | VDLLYAMCDRSHNPEFVQENHLYLETADYSIREEMVILKVAILAEKYAVDYTYWYVITILNLRIRAGDYVSEEVHYRVIQIYINRDOVQGYAAKTVFEALQAPACHENLVKVGYYLGEFGNLTAGDPSAP | 518 |
| Human      | 389 | VDLLYAMCDRSHNPEFVQENHLYLETADYSIREEMVILKVAILAEKYAVDYTYWYVITILNLRIRAGDYVSEEVHYRVIQIYINRDOVQGYAAKTVFEALQAPACHENLVKVGYYLGEFGNLTAGDPSAP | 518 |
| Drosophila | 520 | LVQIKLLHSKYLCSVPIRALLLSTYIKFVNLFPYKATIQDYLRSQSQRNADVELQQRVVEYLRLLSTVASTDILATVLEEMPFPERESSILAKLKKKP                                 | 621 |
| Mouse      | 519 | LVQIKLLHSKYLCSVPIRALLLSTYIKFVNLFPYKATIQDYLRSQSQRNADVELQQRVVEYLRLLSTVASTDILATVLEEMPFPERESSILAKLKKKP                                 | 619 |
| Human      | 519 | LVQIKLLHSKYLCSVPIRALLLSTYIKFVNLFPYKPTIQDYLRSQSQRNADVELQQRVVEYLRLLSTVASTDILATVLEEMPFPERESSILAKLKKKP                                 | 619 |

## B

### Numb-N

|            |     |                                                                                                                                  |     |
|------------|-----|----------------------------------------------------------------------------------------------------------------------------------|-----|
| Drosophila | 1   | HGNSSSTHEPLERGFTRGKFGDVKNGKSASFRRFSKSPKKHDLRFSFDSFARRKDRVPESSKPHQMDDEEAVVSATCSFSVKYLGCVVEVFESRGNQVCEALKVLRQSRRRPVRGLHYSGDGLRV    | 130 |
| Mouse      | 1   | HNKLRSQFR---RKKDYYVPEASRPHQMDDEEAVRGTGKCSFPVKYLGHWVEVDESNGHICEDAVKRLKATGKKAVKAVLHVSADGLRV                                        | 86  |
| Human      | 1   | HNKLRSQFR---RKKDYYVPEASRPHQMDDEEAVRGTGKCSFPVKYLGHWVEVDESNGHICEDAVKRLKATGKKAVKAVLHVSADGLRV                                        | 86  |
| Drosophila | 131 | VDEKTKDLIVDQTIKYSFCAPDRNFRAFSYICRGGTTRRHICHCHAVYKDTGERLSHAVGCAFAACLERKUKREKECGVYAFDASRTTFTRREGSFRVYTAFAQEREIEIMKQQAQKRAETDKTVVGG | 251 |
| Mouse      | 87  | VDEKTKDLIVDQTIKYSFCAPDRNFRAFSYICRGGTTRRHICHCHAVYKDTGERLSHAVGCAFAACLERKUKREKECGVYAFDASRTTFTRREGSFRVYTAFAQEREIEIMKQQAQKRAETDKTVVGG | 216 |
| Human      | 87  | VDEKTKDLIVDQTIKYSFCAPDRNFRAFSYICRGGTTRRHICHCHAVYKDTGERLSHAVGCAFAACLERKUKREKECGVYAFDASRTTFTRREGSFRVYTAFAQEREIEIMKQQAQKRAETDKTVVGG | 216 |
| Drosophila | 252 | ----PSANRGPAAI-----VKPFNFPAIEPNAIPMILEROSFRLSTIGSQ--SPFKRQNSLRINDLPSNARDQRAFLTAAAGNPHMTPLRVSVPIAE--VSPAKSAGADPLSAIYAVRADSVS      | 361 |
| Mouse      | 217 | PSVAPGNTAPSPSSPTPTDGTASSEMNHAIIPRRNHPIQLARQGSFAGFPALSKHSPFKRQLSLRINELPSTHAKTDFPIKNTVPEVEGEAESISLCSQITSAFSTPSEDFSSIPHTKPVTL       | 346 |
| Human      | 217 | SSVAPGNTAPSPSSPTPTDGTATTSLEHNNHAIIPRRNHPIQLARQGSFAGFPALSKHSPFKRQLSLRINELPSTHAKTDFPIKNTVPEVEGEAESISLCSQITNAFSTP-EDFSSIPHTKPVTV    | 345 |
